# Supplementary material
Source: publisher figshare collection journal article supplement (https://aacr.figshare.com/articles/dataset/_/22433396)

# Supplementary Figure 2

**A**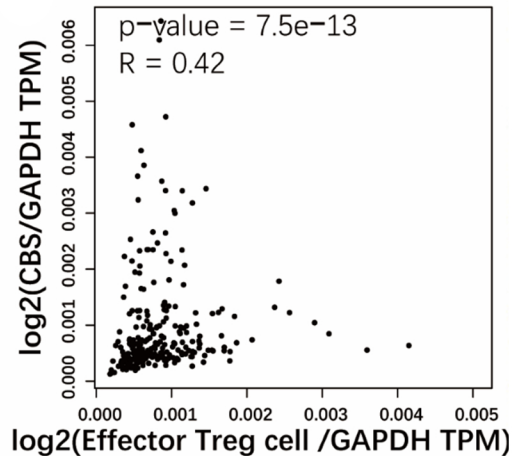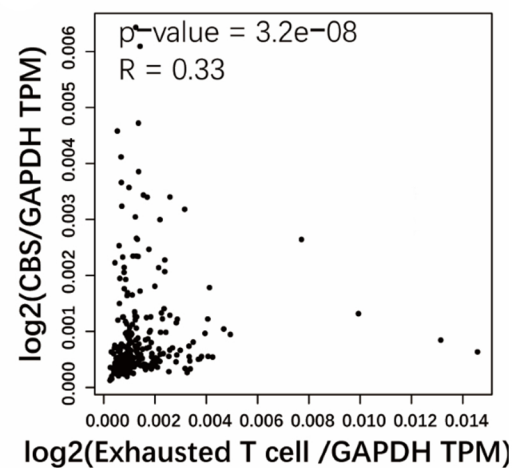**B** #1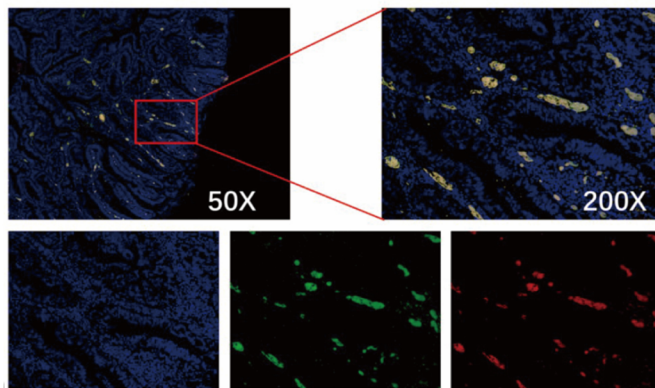

#2

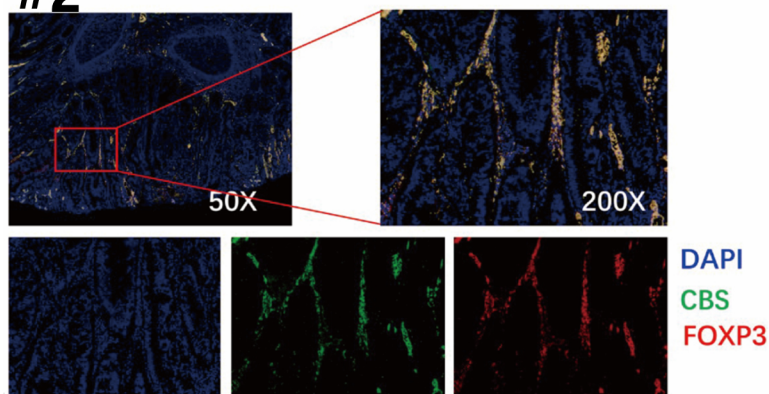**C**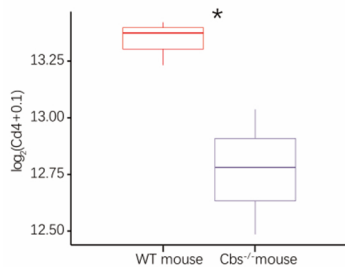**D**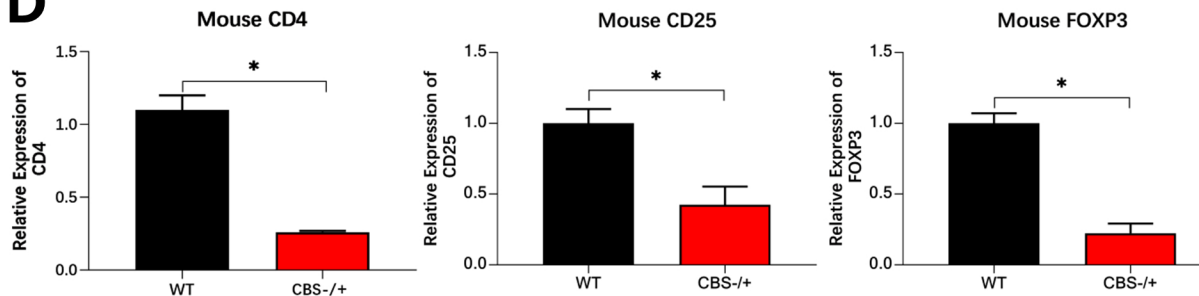

Supplement: Supplementary file 1 [file 39879836]
